# Supplementary material for: 3,4-Vinylenedioxythiophene (VDOT): a new building block for thiophene-based π-conjugated systems
Source: Royal Society of Chemistry journal article supplement (doi:10.1039/b513923f), 2005-11-29
Supplement: b513923f.pdf [file b513923f.pdf]

## 3,4-Vinylenedioxythiophene as a new EDOT analogue for thiophene-based $\pi$ -conjugated systems

Philippe Leriche,\* Philippe Blanchard,\* Pierre Frère, Eric Levillain, Gilles Mabon and Jean Roncali

<sup>a</sup> Groupe Systèmes Conjugués Linéaires, CIMMA UMR CNRS 6200, Université d'Angers, 2 Bd Lavoisier, 49045 Angers, France. Fax: 33 2 41 73 54 05; Tel: 33 2 41 73 50 10; E-mail: [Philippe.Leriche@univ-angers.fr](mailto:Philippe.Leriche@univ-angers.fr), [Philippe.Blanchard@univ-angers.fr](mailto:Philippe.Blanchard@univ-angers.fr).

### ELECTRONIC SUPPLEMENTARY INFORMATION

#### EXPERIMENTAL PROCEDURES AND CHARACTERIZATIONS

Electrochemical studies were performed in a standard three-electrode configuration under the argon blanket. The working electrode was a 1 mm Pt disk sealed in glass, the reference electrode was Ag/AgCl 0.1 M, the potential scans were performed with an EG&G 273 potentiostat. The supporting electrolyte was tetrabutylammonium hexafluorophosphate (Fluka puriss, used as received). <sup>1</sup>H NMR and <sup>13</sup>C NMR spectra were recorded on a Bruker AVANCE DRX 500 spectrometer operating at 500.13 and 125.7 MHz;  $\delta$  are given in ppm (relative to TMS) and coupling constants (J) in Hz. Mass spectra were recorded under EI or FAB mode on a VG-Autospec mass spectrometer, under MALDI-TOF mode on a MALDI-TOF-MS BIFLEX III Bruker Daltonics spectrometer or under positive electrospray (ESI+) on a JMS-700 JEOL mass spectrometer of reversed geometry. UV-visible optical data were recorded with a Perkin-Elmer lambda 19 spectrophotometer. Melting points were obtained from a Reichert-Jung Thermovar hot-stage microscope apparatus and are uncorrected. Column chromatography purifications were carried out on Merck silica gel Si 60 (40-63  $\mu$ m).

#### SPECTROSCOPIC DATA FOR 3-4

**3:** white solid; mp 86°C; <sup>1</sup>H NMR (CDCl<sub>3</sub>): 6.28 (s, 2 H), 4.27 (t, <sup>3</sup>J=7.2Hz 4H), 3.44 (t, <sup>3</sup>J=7.2Hz 4H); <sup>13</sup>C NMR (CDCl<sub>3</sub>): 146.0, 99.5, 71.0, 0.48; EIMS calcd for C<sub>8</sub>H<sub>10</sub>Cl<sub>2</sub>O<sub>2</sub>S : 423.83; found: 423.8.

**4:** colorless oil; <sup>1</sup>H NMR (CDCl<sub>3</sub>): 6.61 (dd, <sup>3</sup>J=13.6Hz, <sup>3</sup>J=6.0Hz, 2H), 6.54 (s, 2H); 4.84 (dd, <sup>3</sup>J=13.6Hz, <sup>2</sup>J=2.0Hz 2H), 4.45 (dd, <sup>3</sup>J=6.2Hz, <sup>2</sup>J=2.0Hz 2H); <sup>13</sup>C NMR (CDCl<sub>3</sub>): 148.7, 144.5, 104.1, 95.1; EIMS calcd for C<sub>8</sub>H<sub>8</sub>O<sub>2</sub>S : 168.02; found: 197.99. Anal. for C<sub>8</sub>H<sub>8</sub>O<sub>2</sub>S. Found (Calcd) : C, 56.84 (57.12); H, 4.86 (4.79); O, 20.04 (19.02); S, 18.67 (19.06).

**X-RAY DATA FOR 2**

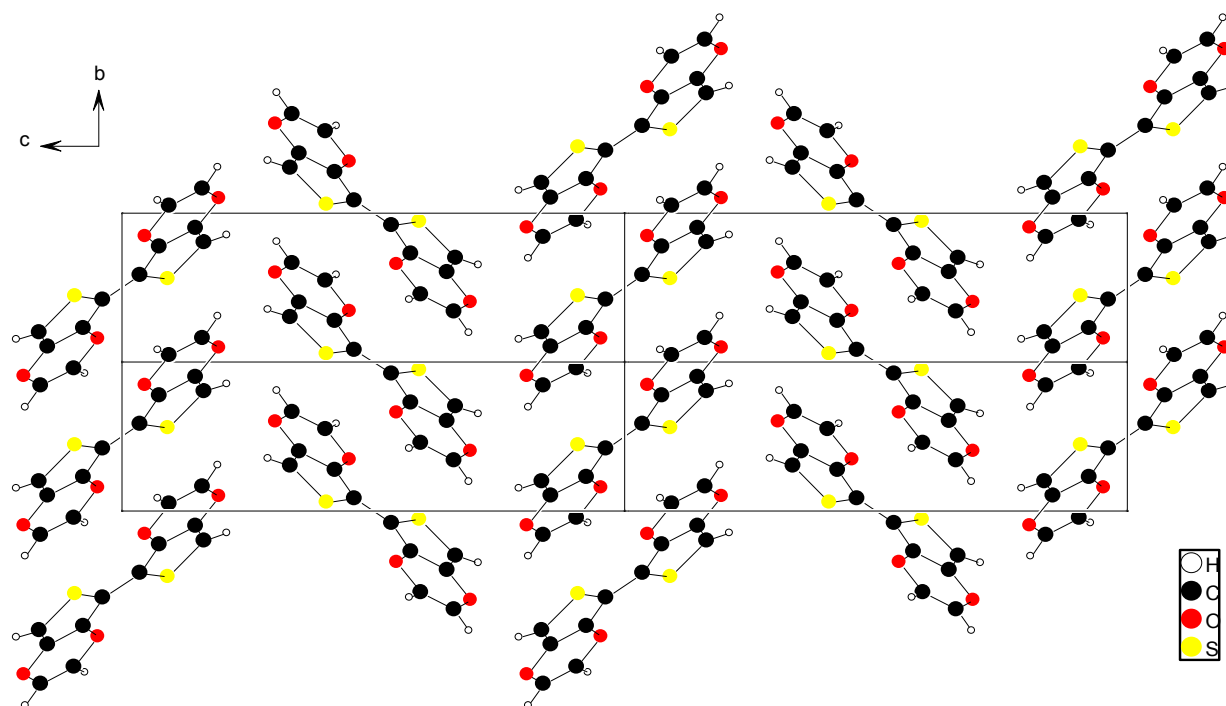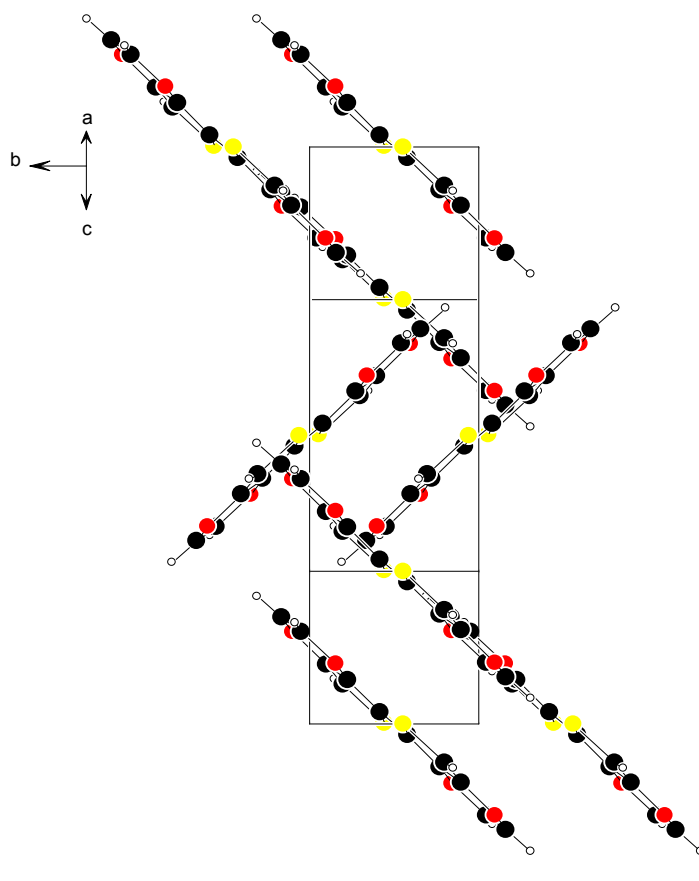

Distance between 2 planar molecules = 3.444(4) Å

**HOMO AND LUMO OF 1 AND 2, CALCULATED AND MEASURED (X-RAY) BOND LENGTH FOR 2 AND BEDOT**

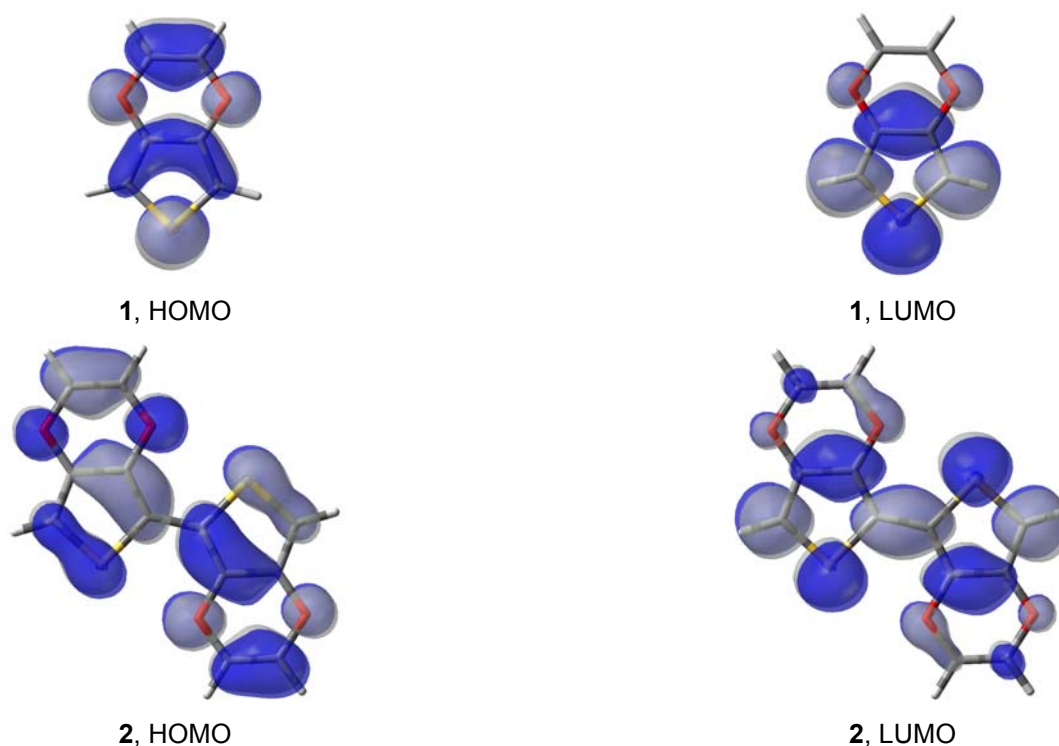

Table 6: Calculated and measured (X-ray diffraction bond length in BEDOT and BVDOT 2)

|        | BEDOT                                                                               |                      | BVDOT 2                                                                              |           |
|--------|-------------------------------------------------------------------------------------|----------------------|--------------------------------------------------------------------------------------|-----------|
|        | 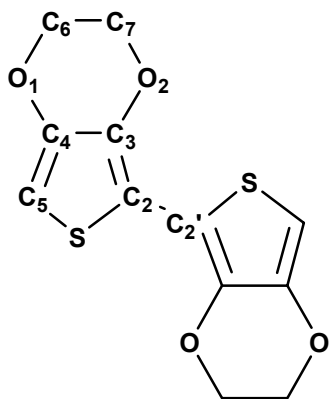 |                      |  |           |
|        | Calc.                                                                               | X-ray                | Calc.                                                                                | X-ray     |
| C2-C3  | 1.379                                                                               | 1.3733(3)            | 1.374                                                                                | 1.3790(2) |
| C3-C4  | 1.429                                                                               | 1.4205(3)            | 1.428                                                                                | 1.4067(3) |
| C4-C5  | 1.365                                                                               | 1.3467(3)            | 1.359                                                                                | 1.3455(2) |
| C5-S   | 1.738                                                                               | 1.7155(3)            | 1.742                                                                                | 1.7108(2) |
| S-C2   | 1.764                                                                               | 1.7316(2)            | 1.768                                                                                | 1.7404(3) |
| C2-C2' | 1.443                                                                               | 1.4416(3)            | 1.444                                                                                | 1.4460(2) |
| C3-O2  | 1.370                                                                               | 1.36865 <sup>°</sup> | 1.374                                                                                | 1.3790(2) |
| O1-C6  | 1.431                                                                               | 1.4500(4)            | 1.383                                                                                | 1.3948(2) |
| C6-C7  | 1.523                                                                               | 1.4829(5)            | 1.333                                                                                | 1.3023(2) |
| C7-O2  | 1.432                                                                               | 1.4351(3)            | 1.385                                                                                | 1.3846(2) |
| O1-C4  | 1.370                                                                               | 1.3740(3)            | 1.376                                                                                | 1.3830(2) |

**CYCLIC VOLTAMMETRY OF POLY(BVDOT)**

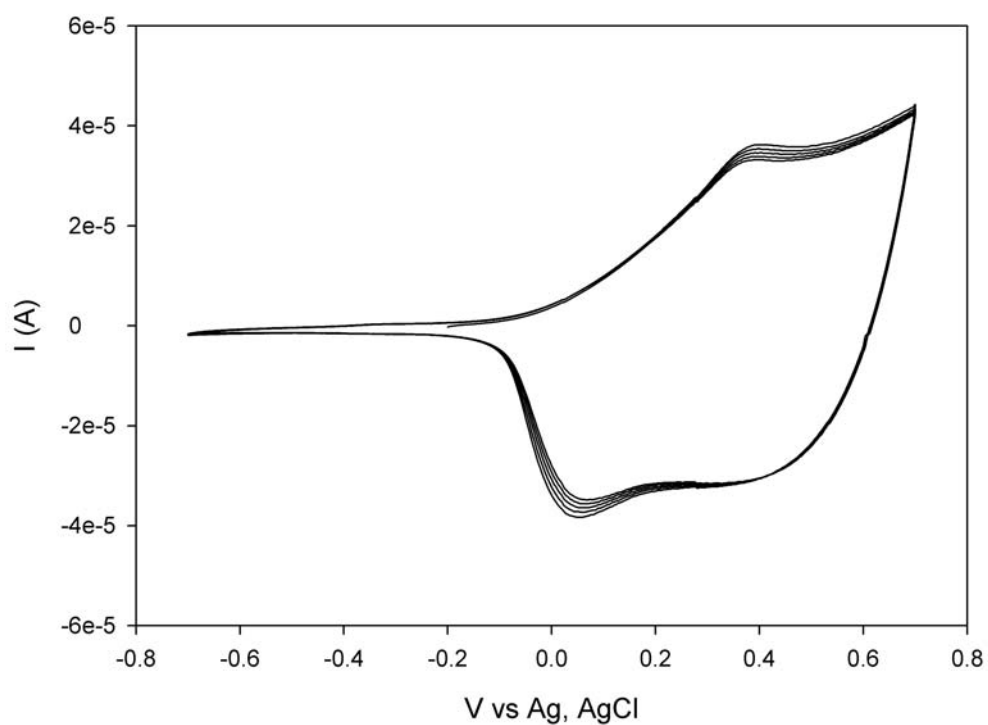

Redox behaviour of poly(BVDOT) polymer in  $10^{-1}$  M tetrabutylammonium hexafluorophosphate/methylene chloride solution (scan rate :  $50 \text{ mV.s}^{-1}$ ).
